# Supplementary material
Source: PubMed Central journal article supplement (PMC4424016)
Supplement: supp_pp.114.255711_255711suppfigstbls.pdf [file supp_pp.114.255711_255711suppfigstbls.pdf]

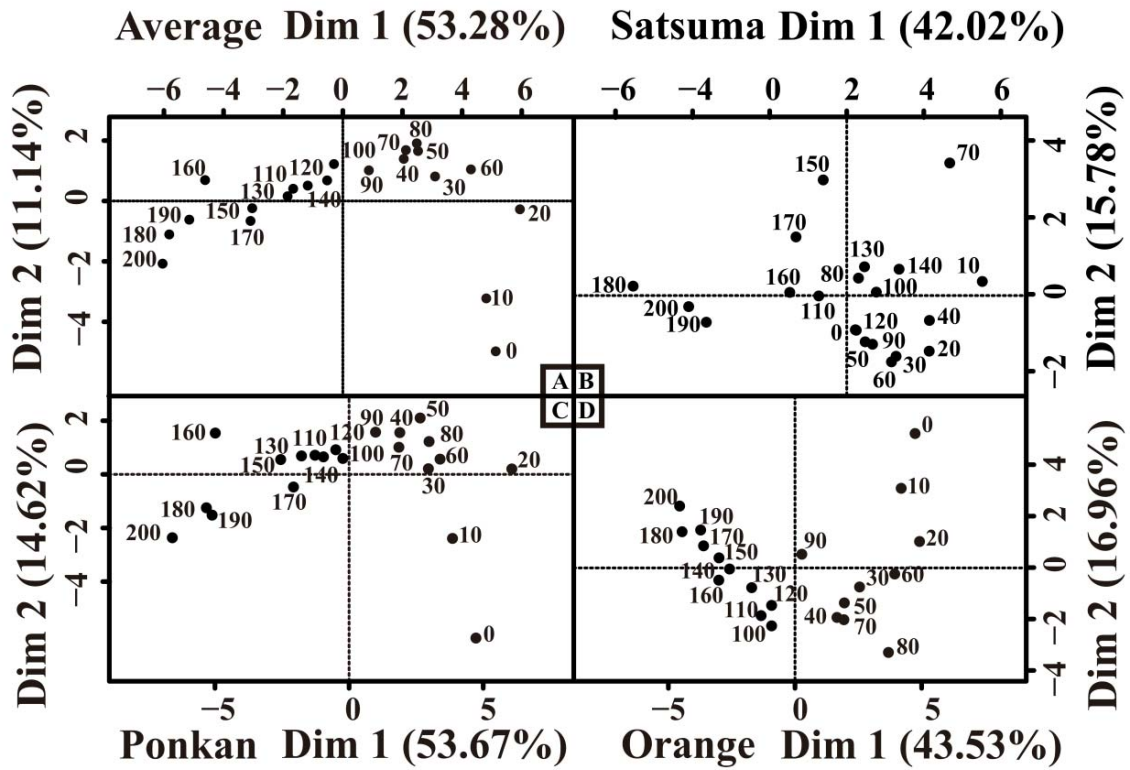

**Supplemental Figure S1.** Principal component analysis (PCA) using conventional physiological quality data during 0-200 DAH.

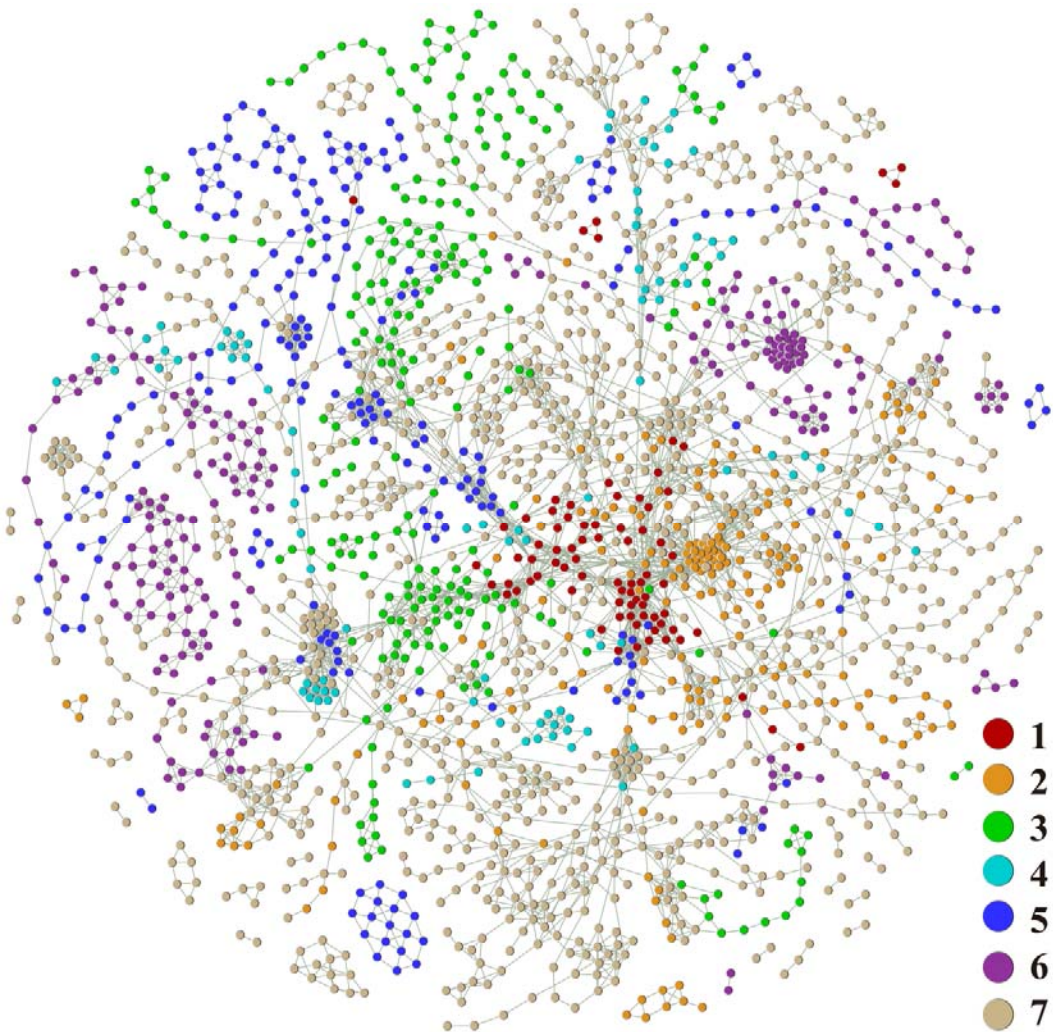

**Supplemental Figure S2.** General map of CitrusCyc constructed based on Aracyc. Numbers represent: 1, TCA; 2, amino acid; 3, sugars; 4, secondary metabolites; 5, lipids; 6, hormones; 7, others;

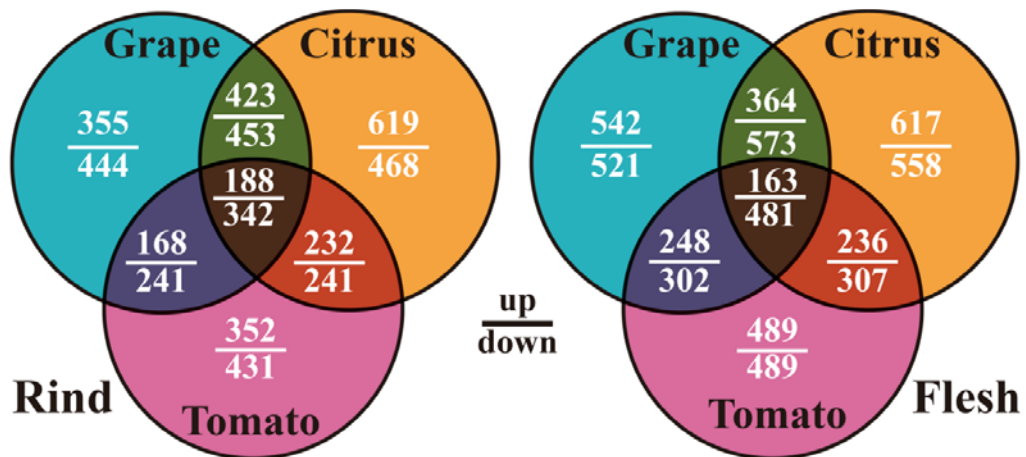

**Supplemental Figure S3.** Venn diagrams of numbers of DEGs identified by comparing the transcription data of post- and pre-ripening samples of tomato, grape and citrus.

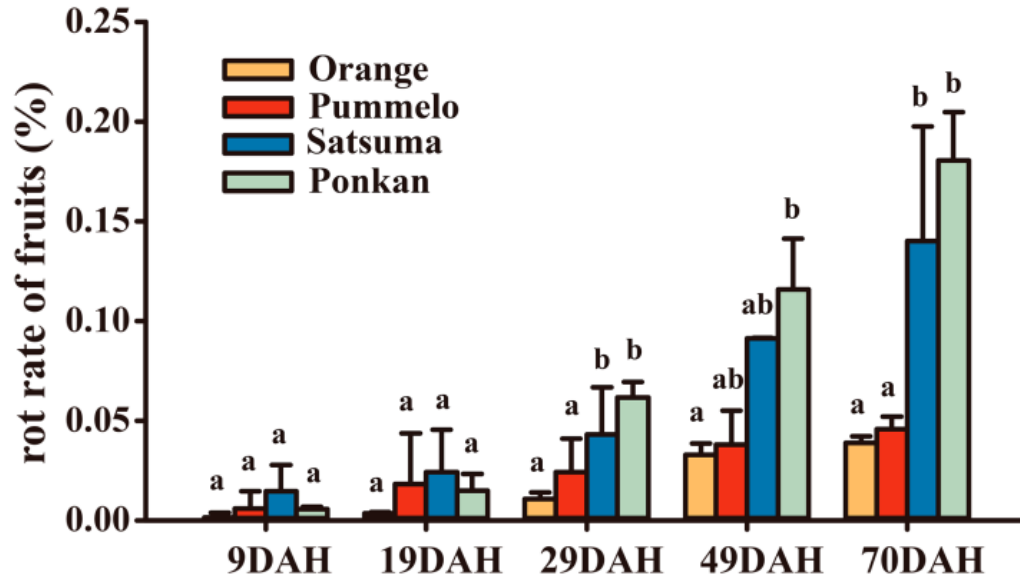

**Supplemental Figure S4.** Rot rate of four varieties during 70 DAH storage. Different letters (a and b) represent the statistical significances ( $p$ -value $<0.05$ , analyzed by Student's T-test). Values represent the means of two bio-replicates and vertical bars represent standard deviations. It is demonstrated that Ponkan & Satsuma are more perishable than orange & pummelo.

**Supplemental Table S1.** Sample classification for identification of DEGs at the three levels.

| <b>Samples</b> | <b>Time level</b> | <b>Tissue level</b> | <b>Varity level</b> |
|----------------|-------------------|---------------------|---------------------|
| Or.0DAH        | g1-1              | g1-1                | g1-1                |
| Or.10DAH       | g1-2              | g1-1                | g1-1                |
| Or.20DAH       | g1-3              | g1-1                | g1-1                |
| Or.30DAH       | g1-4              | g1-1                | g1-1                |
| Or.40DAH       | g1-5              | g1-1                | g1-1                |
| Or.50DAH       | g1-6              | g1-1                | g1-1                |
| Kr.0DAH        | g2-1              | g2-1                | g1-2                |
| Kr.10DAH       | g2-2              | g2-1                | g1-2                |
| Kr.20DAH       | g2-3              | g2-1                | g1-2                |
| Kr.30DAH       | g2-4              | g2-1                | g1-2                |
| Kr.40DAH       | g2-5              | g2-1                | g1-2                |
| Kr.50DAH       | g2-6              | g2-1                | g1-2                |
| Sr.0DAH        | g3-1              | g3-1                | g1-3                |
| Sr.10DAH       | g3-2              | g3-1                | g1-3                |
| Sr.20DAH       | g3-3              | g3-1                | g1-3                |
| Sr.30DAH       | g3-4              | g3-1                | g1-3                |
| Sr.40DAH       | g3-5              | g3-1                | g1-3                |
| Sr.50DAH       | g3-6              | g3-1                | g1-3                |
| Pr.0DAH        | g4-1              | g4-1                | g1-4                |
| Pr.10DAH       | g4-2              | g4-1                | g1-4                |
| Pr.20DAH       | g4-3              | g4-1                | g1-4                |
| Pr.30DAH       | g4-4              | g4-1                | g1-4                |
| Pr.40DAH       | g4-5              | g4-1                | g1-4                |
| Pr.50DAH       | g4-6              | g4-1                | g1-4                |
| Of.0DAH        | g5-1              | g1-2                | g2-1                |
| Of.10DAH       | g5-2              | g1-2                | g2-1                |
| Of.20DAH       | g5-3              | g1-2                | g2-1                |
| Of.30DAH       | g5-4              | g1-2                | g2-1                |
| Of.40DAH       | g5-5              | g1-2                | g2-1                |
| Of.50DAH       | g5-6              | g1-2                | g2-1                |
| Kf.0DAH        | g6-1              | g2-2                | g2-2                |
| Kf.10DAH       | g6-2              | g2-2                | g2-2                |
| Kf.20DAH       | g6-3              | g2-2                | g2-2                |
| Kf.30DAH       | g6-4              | g2-2                | g2-2                |
| Kf.40DAH       | g6-5              | g2-2                | g2-2                |
| Kf.50DAH       | g6-6              | g2-2                | g2-2                |
| Sf.0DAH        | g7-1              | g3-2                | g2-3                |
| Sf.10DAH       | g7-2              | g3-2                | g2-3                |
| Sf.20DAH       | g7-3              | g3-2                | g2-3                |

|          |      |      |      |
|----------|------|------|------|
| Sf.30DAH | g7-4 | g3-2 | g2-3 |
| Sf.40DAH | g7-5 | g3-2 | g2-3 |
| Sf.50DAH | g7-6 | g3-2 | g2-3 |
| Pf.0DAH  | g8-1 | g4-2 | g2-4 |
| Pf.10DAH | g8-2 | g4-2 | g2-4 |
| Pf.20DAH | g8-3 | g4-2 | g2-4 |
| Pf.30DAH | g8-4 | g4-2 | g2-4 |
| Pf.40DAH | g8-5 | g4-2 | g2-4 |
| Pf.50DAH | g8-6 | g4-2 | g2-4 |

**Supplemental Table S2.** Proportions of the first-level and second-level linkages to the total linkages in the correlation network between metabolites and RE-values (Network-MR).

| Significant<br>Correlation<br>Reactions (%) | Rind 1st-level |             | Flesh 1st-level |             | Rind 2nd-level |             | Flesh 2nd-level |             |
|---------------------------------------------|----------------|-------------|-----------------|-------------|----------------|-------------|-----------------|-------------|
|                                             | Pos.           | Neg.        | Pos.            | Neg.        | Pos.           | Neg.        | Pos.            | Neg.        |
| Glucose                                     | 0              | 0           | <b>0.68</b>     | 0.18        | 0.03           | 0.1         | <b>0.51</b>     | 0.19        |
| Fructose                                    | 0              | 0           | <b>0.67</b>     | 0           | 0.12           | 0           | <b>0.39</b>     | 0.12        |
| 4-Ketoglucose                               | 0              | <b>0.33</b> | <b>0.33</b>     | 0           | 0              | <b>0.67</b> | <b>0.33</b>     | 0           |
| Galactose                                   | 0.13           | 0.19        | 0.06            | <b>0.75</b> | 0.17           | <b>0.39</b> | 0.17            | 0.2         |
| Myo-Inositol                                | 0              | 0.11        | 0               | <b>0.33</b> | 0.06           | <b>0.31</b> | 0.06            | 0.25        |
| Sucrose                                     | 0              | 0           | <b>0.43</b>     | 0           | 0              | 0.03        | 0.09            | 0.08        |
| Glycerol                                    | <b>0.5</b>     | 0           | 0               | <b>0.5</b>  | 0.23           | 0.23        | 0               | 0           |
| Citric acid                                 | 0              | <b>0.33</b> | 0               | 0           | 0.22           | <b>0.33</b> | <b>0.33</b>     | <b>0.35</b> |
| Aconitic acid                               | 0              | 0           | 0               | 0           | 0              | <b>0.33</b> | 0.17            | 0           |
| 2-Butenedioic acid                          | 0              | 0.14        | <b>0.43</b>     | 0           | 0.07           | 0.05        | 0.27            | 0.09        |
| Malic acid                                  | <b>0.43</b>    | 0           | 0               | 0.14        | <b>0.3</b>     | <b>0.32</b> | 0.04            | 0.27        |
| Malonic acid                                | -              | -           | -               | -           | 0.05           | 0           | <b>0.62</b>     | 0.03        |
| Butanedioic acid                            | <b>0.44</b>    | <b>0.39</b> | <b>0.5</b>      | 0.17        | <b>0.3</b>     | 0.19        | 0.14            | 0.11        |
| Butanoic acid                               | 0              | 0           | 0               | 0           | -              | -           | -               | -           |
| Isocitric acid                              | 0.2            | <b>0.6</b>  | 0.2             | 0.2         | <b>0.3</b>     | <b>0.41</b> | 0.16            | 0.14        |
| Asparagine                                  | 0              | 0.2         | 0.2             | <b>0.4</b>  | 0.23           | 0.08        | 0.23            | 0.23        |
| Aspartic acid                               | 0.14           | 0.07        | 0.14            | 0.07        | 0.11           | 0.15        | 0.03            | 0.02        |
| Citrulline                                  | <b>0.43</b>    | 0.14        | 0               | 0           | 0.13           | 0.19        | 0               | 0           |
| Glycine                                     | 0              | 0.17        | 0.25            | 0.25        | 0.07           | 0.09        | 0.14            | <b>0.31</b> |
| Alanine                                     | 0.06           | 0           | 0.13            | 0.19        | 0.04           | 0.07        | <b>0.36</b>     | 0.12        |
| Valine                                      | 0              | 0           | 1               | 0           | 0              | 0           | <b>0.33</b>     | 0           |

Network-MR was constructed by Jaccard distance. Jaccard distance had two values positive value (Pos.) and negative value (Neg.) The threshold was set to |Jaccard distance value|  $\geq$  0.4. First-level and second-level linkages in the network was counted (%). The letter “-” presents miss values. Proportion values  $\geq$ 0.3 was in bold.

**Supplemental Table S3.** Ratio of array covered genes from different information resources of citrus genes.

| Sequences resources                                                            | NO. of genes in Array | Total genes | Array coverage ratio |
|--------------------------------------------------------------------------------|-----------------------|-------------|----------------------|
| CDSs in genome of clementine mandarin (Wu et al., 2014)                        | 19018                 | 33929       | 0.56                 |
| CDSs in genome of sweet orange (Wu et al., 2014)                               | 24007                 | 46174       | 0.52                 |
| CDSs in genome of sweet orange (Xu et al., 2013)                               | 22776                 | 44275       | 0.51                 |
| Genes in genome of sweet orange (Xu et al., 2014)                              | 15083                 | 29655       | 0.51                 |
| Genes expressed in fruit of sweet orange [detected by RNAseq](Xu et al., 2013) | 11380                 | 14543       | 0.78                 |
| ESTs of <i>Poncirus trifoliata</i> [NCBI]                                      | 18427                 | 61874       | 0.30                 |
| ESTs of <i>Citrus paradisi</i> x <i>Citrus trifoliata</i> [NCBI]               | 5181                  | 8039        | 0.64                 |
| ESTs of <i>Citrus paradisi</i> [NCBI]                                          | 5076                  | 7954        | 0.64                 |

To investigate citrus microarray coverage, CDSs sequences from 3 citrus genomes (Clementine mandarin (Wu et al., 2014), sweet oranges (Xu et al., 2013; Wu et al., 2014) were downloaded. We also investigated the microarray coverage for the genes expressed in the fruit of sweet orange (as supported by RNAseq evidence (Xu et al., 2014)). In addition, ESTs sequences from other citrus varieties were also downloaded from NCBI, including *Poncirus trifoliata* which was chosen as the negative control, and *Citrus paradisi*, a closely related species of pummelo (adequate information of pummelo sequences is still not available yet). BLAST (E value  $\leq 1e-5$ ) was used to find the sequence similarities of the probesets to the genes.



**Supplemental Table S4.** Numbers of DEGs at early stage (0-10 DAH) by comparing samples of loose- and tight-skin citrus.

| loose-skin / tight-skin                                                                                   | All GEG | flesh-up | flesh-down | rind-up | rind-down |
|-----------------------------------------------------------------------------------------------------------|---------|----------|------------|---------|-----------|
| cell wall.modification                                                                                    | 37      | 11       | 5          | 10      | 6         |
| fermentation.ADH                                                                                          | 3       | 2        | 0          | 0       | 0         |
| fermentation.LDH                                                                                          | 1       | 1        | 0          | 1       | 0         |
| fermentation.PDC                                                                                          | 3       | 1        | 0          | 1       | 0         |
| gluconeogenesis/ glyoxylate cycle.PEPCK                                                                   | 2       | 1        | 0          | 1       | 0         |
| glycolysis.cytosolic branch.phosphoglucomutase (PGM)                                                      | 3       | 1        | 0          | 1       | 0         |
| glycolysis.cytosolic branch.pyruvate kinase (PK)                                                          | 5       | 1        | 0          | 2       | 0         |
| glycolysis.plastid branch.pyruvate kinase (PK)                                                            | 6       | 2        | 1          | 1       | 0         |
| hormone metabolism.ethylene.induced-regulated-responsive-activated                                        | 18      | 1        | 0          | 1       | 2         |
| hormone metabolism.ethylene.signal transduction                                                           | 37      | 7        | 7          | 8       | 6         |
| hormone metabolism.ethylene.synthesis-degradation                                                         | 8       | 0        | 1          | 2       | 1         |
| hormone                                                                                                   |         |          |            |         |           |
| metabolism.ethylene.synthesis-degradation.1-aminocyclopropane-1-carb<br>oxylate synthase                  | 4       | 1        | 0          | 2       | 1         |
| major CHO metabolism                                                                                      | 39      | 10       | 3          | 8       | 6         |
| minor CHO metabolism                                                                                      | 79      | 22       | 5          | 20      | 9         |
| mitochondrial electron transport / ATP synthesis.alternative oxidase                                      | 2       | 1        | 0          | 1       | 0         |
| mitochondrial electron transport / ATP synthesis.cytochrome c                                             | 6       | 0        | 0          | 1       | 0         |
| mitochondrial electron transport / ATP synthesis.F1-ATPase                                                | 12      | 0        | 0          | 1       | 0         |
| mitochondrial electron transport / ATP synthesis.NADH-DH.type<br>II.external                              | 3       | 0        | 0          | 1       | 0         |
| mitochondrial electron transport / ATP synthesis.NADH-DH.type<br>II.internal matrix                       | 2       | 2        | 0          | 1       | 0         |
| mitochondrial electron transport / ATP synthesis.uncoupling protein                                       | 3       | 1        | 0          | 1       | 0         |
| redox.ascorbate and glutathione.ascorbate                                                                 | 15      | 2        | 1          | 4       | 1         |
| redox.ascorbate and glutathione.ascorbate.GME                                                             | 1       | 1        | 0          | 1       | 0         |
| redox.ascorbate and glutathione.glutathione                                                               | 12      | 5        | 0          | 4       | 0         |
| redox.dismutases and catalases                                                                            | 14      | 4        | 0          | 5       | 1         |
| redox.glutaredoxins                                                                                       | 17      | 3        | 0          | 2       | 3         |
| redox.heme                                                                                                | 3       | 1        | 0          | 1       | 0         |
| redox.peroxiredoxin.BAS1                                                                                  | 1       | 1        | 0          | 1       | 0         |
| RNA.regulation of transcription.AP2/EREBP,<br>APETALA2/Ethylene-responsive element binding protein family | 43      | 13       | 3          | 16      | 0         |
| RNA.regulation of transcription.AS2,Lateral Organ Boundaries Gene                                         | 13      | 8        | 2          | 6       | 1         |

|                                                                         |     |    |    |    |    |
|-------------------------------------------------------------------------|-----|----|----|----|----|
| Family                                                                  |     |    |    |    |    |
| RNA.regulation of transcription.Aux/IAA family                          | 16  | 5  | 1  | 5  | 2  |
| RNA.regulation of transcription.WRKY domain transcription factor family | 31  | 11 | 5  | 12 | 3  |
| signalling.calcium                                                      | 141 | 27 | 12 | 24 | 11 |
| signalling.in sugar and nutrient physiology                             | 21  | 4  | 3  | 6  | 2  |
| stress.abiotic.drought/salt                                             | 40  | 10 | 4  | 11 | 3  |
| stress.abiotic.touch/wounding                                           | 13  | 5  | 1  | 7  | 2  |
| stress.biotic.respiratory burst                                         | 5   | 1  | 0  | 3  | 0  |
| TCA / org. transformation.carbonic anhydrases                           | 5   | 1  | 0  | 1  | 2  |
| TCA / org. transformation.other organic acid transformaitons.cyt MDH    | 3   | 1  | 0  | 0  | 0  |
| TCA / org. transformation.other organic acid transformaitons.malic      | 5   | 0  | 0  | 1  | 0  |
| TCA / org. transformation.TCA.aconitase                                 | 3   | 1  | 0  | 0  | 0  |
| TCA / org. transformation.TCA.IDH                                       | 5   | 1  | 0  | 1  | 0  |
| TCA / org. transformation.TCA.malate DH                                 | 2   | 1  | 0  | 0  | 0  |
| TCA / org. transformation.TCA.succinyl-CoA ligase                       | 4   | 1  | 0  | 1  | 0  |
| transport.phosphate                                                     | 14  | 2  | 1  | 3  | 1  |
| transporter.sugars                                                      | 35  | 11 | 5  | 14 | 4  |

---

**Supplemental Table S5.** Quantitative real-time PCR verification of selective probesets in orange rind and flesh.

| Tissue | cit                 | cor   | Forward primer               | Reverse primer                  |
|--------|---------------------|-------|------------------------------|---------------------------------|
| Rind   | ACTIN               |       | CCAAGCAGCATGAAGATCAA         | ATCTGCTGGAAGGTGCTGAG            |
| Rind   | Cit.39752.1.S1_at   | 0.691 | CTGGTTGTGGTGCATGCTTT         | TTCCTCTGCCGCTACACAGA            |
| Rind   | Cit.11241.1.S1_s_at | 0.645 | TGGAAGGATGGAACGAACA          | CGGTCAGAGGGTGAAAGC              |
| Rind   | Cit.15919.1.S1_at   | 0.727 | TCGGAAACTTCTGAACAGC          | CCAACCCTTCTCCCCATT              |
| Rind   | Cit.11731.1.S1_s_at | 0.741 | GTTTCGGCATCTTCTTGTCTT        | CTTCAATCGGCACATTCTTT            |
| Rind   | Cit.21919.1.S1_s_at | 0.788 | AATGCTCGTGACCTTGATACT<br>T   | GGTTGCTTTGCCCTTAG               |
| Rind   | Cit.18023.1.S1_at   | 0.779 | CGACGTTGTTGGTCTCCTC          | CCACTTTGGTATCTTCTTTTGC          |
| Rind   | Cit.35761.1.S1_at   | 0.797 | CTGGCTATTGTGCGTGCTTAG<br>T   | TTGTAAGGAATGGCCCAGAAA           |
| Rind   | Cit.37918.1.S1_at   | 0.875 | CGTGGCGCTTTCATTGC            | ACCACCAGGCTAAGATTCCAA<br>A      |
| Rind   | Cit.20698.1.S1_at   | 0.623 | GCTGGTGCTGGAGGTGCTTA         | GCCATTCATCTTCAGCAATCG           |
| Rind   | Cit.2071.1.S1_s_at  | 0.723 | AAAAGCGCATTGGCATCAC          | ACCTTCTTCTCCGGTTCGT             |
| Rind   | Cit.29959.1.S1_at   | 0.617 | GCATGCCTGAAAAGGATTCG         | CAACCACAGCCTCGTCTGAA            |
| Rind   | Cit.39208.1.S1_s_at | 0.872 | TCTGCTGCTGCATGACGAA          | GAGGTAGAATGAGCAGAAGA<br>AAGATTC |
| Rind   | Cit.21825.1.S1_s_at | 0.765 | CGACCACCGTGGAATCAGA          | CTCAGGGTCATAAGATGGCAA<br>TC     |
| Rind   | Cit.4697.1.S1_at    | 0.978 | TGGGAAAGCACCAAGGTTGT         | CTCACTCCCGTGCGGAAT              |
| Rind   | Cit.326.1.S1_at     | 0.649 | CTCTGTCACTGGAAGTGGCAT<br>C   | CCTTCTCCTTGTGTAAATCAC<br>C      |
| Flesh  | ACTIN               |       | CCAAGCAGCATGAAGATCAA         | ATCTGCTGGAAGGTGCTGAG            |
| Flesh  | Cit.29933.1.S1_at   | 0.618 | ACGGATGAAATGGGAAACC          | ACCAACCCCTACTGTCTGCT            |
| Flesh  | Cit.5117.1.S1_at    | 0.79  | AGCCACGGTTATGGTTTCA          | CAATAATCACTCACGCTTCTT<br>A      |
| Flesh  | Cit.10350.1.S1_s_at | 0.895 | AGGAGCAACGAGTCCAGTAA<br>A    | TTCATATCCAGGGCACAGC             |
| Flesh  | Cit.18884.1.S1_at   | 0.574 | ATTAAATAACGATGTGGAAGT<br>CAG | AAACTCACCAAATGTCCTCTA<br>CTA    |
| Flesh  | Cit.40270.1.S1_s_at | 0.771 | GCTACTGTGCGTGACCTAAAT<br>A   | CAACAGCGGAGTCAAAAGAT            |
| Flesh  | Cit.19396.1.S1_s_at | 0.602 | CGGACCACGATGCACGAC           | GCACTTGGCACAGCACTTTT            |

|       |                     |       |                             |                             |
|-------|---------------------|-------|-----------------------------|-----------------------------|
| Flesh | Cit.8763.1.S1_s_at  | 0.764 | CCATCCCATTCAAGTCCAA         | TCAAGAACCACAAACACCGA        |
| Flesh | Cit.1625.1.S1_s_at  | 0.929 | CTGGATGCTTGTGGTGATG         | TCCAATAGCCTCTGAACCTTT       |
| Flesh | Cit.39752.1.S1_at   | 0.727 | CTGCTGGTGTTCCTTCCC          | TGGTTCCTCTGCCGCTAC          |
| Flesh | Cit.4893.1.S1_s_at  | 0.567 | CTTCTGGAAATGGACCGC          | TTCTAACCTTGTTCAGGGTATC<br>A |
| Flesh | Cit.11731.1.S1_s_at | 0.927 | GCTCCCCGAGACAAAGAA          | AAACCATCGTCAACCATAAAA<br>T  |
| Flesh | Cit.6756.1.S1_at    | 0.94  | TTCCGACTTGAAGCCTGTT         | AAGGAAGGTCTTGATGTAAAC<br>G  |
| Flesh | Cit.13424.1.S1_at   | 0.667 | CAGGGAATGAGTTAGCCAAGC       | GCCCACCACTGTCCATCTGT        |
| Flesh | Cit.1200.1.S1_s_at  | 0.888 | CCCGTGTTCAAGACCGAC          | GCGTCATCCTTAGGGTAACTG       |
| Flesh | Cit.580.1.S1_x_at   | 0.752 | CCACTTATCACCTCTACCACC<br>CT | TGCCGTCAAGTCCCATCC          |

---

**Supplemental Table S6.** Database resources for the investigation of homologous gene copies.

| Species                       | URL                                                                                                                                                                                                             |
|-------------------------------|-----------------------------------------------------------------------------------------------------------------------------------------------------------------------------------------------------------------|
| apple                         | <a href="http://www.rosaceae.org/species/malus/malus_x_domestica/genome_v1.0p">http://www.rosaceae.org/species/malus/malus_x_domestica/genome_v1.0p</a>                                                         |
| tomato                        | <a href="ftp://ftp.solgenomics.net/tomato_genome/annotation/ITAG2.4_release/">ftp://ftp.solgenomics.net/tomato_genome/annotation/ITAG2.4_release/</a>                                                           |
| banana                        | <a href="http://banana-genome.cirad.fr/content/download-dh-pahang">http://banana-genome.cirad.fr/content/download-dh-pahang</a>                                                                                 |
| papaya                        | <a href="ftp://ftp.jgi-psf.org/pub/compngen/phytozome/v9.0/Cpapaya/assembly/Cpapaya_113.fa.gz">ftp://ftp.jgi-psf.org/pub/compngen/phytozome/v9.0/Cpapaya/assembly/Cpapaya_113.fa.gz</a>                         |
|                               | <a href="ftp://ftp.bioinfo.wsu.edu/species/Prunus_persica/Prunus_persica-genome.v1.0/genes/">ftp://ftp.bioinfo.wsu.edu/species/Prunus_persica/Prunus_persica-genome.v1.0/genes/</a>                             |
| peach                         |                                                                                                                                                                                                                 |
| <i>citrus clementina</i>      | <a href="http://genome.jgi.doe.gov/pages/dynamicOrganismDownload.jsf?organism=PhytozomeV9">http://genome.jgi.doe.gov/pages/dynamicOrganismDownload.jsf?organism=PhytozomeV9</a>                                 |
| <i>citrus sinensis</i> [JGI]  | <a href="http://genome.jgi.doe.gov/pages/dynamicOrganismDownload.jsf?organism=PhytozomeV9">http://genome.jgi.doe.gov/pages/dynamicOrganismDownload.jsf?organism=PhytozomeV9</a>                                 |
| <i>citrus sinensis</i> [HZAU] | <a href="http://citrus.hzau.edu.cn/orange/">http://citrus.hzau.edu.cn/orange/</a>                                                                                                                               |
| cherry                        | <a href="ftp://ftp.bioinfo.wsu.edu/species/Pyrus_communis/Pcommunis-draft_genome.v1.0/genes/">ftp://ftp.bioinfo.wsu.edu/species/Pyrus_communis/Pcommunis-draft_genome.v1.0/genes/</a>                           |
|                               |                                                                                                                                                                                                                 |
| strawberry                    |                                                                                                                                                                                                                 |
| [hybrid]                      | <a href="http://www.rosaceae.org/species/fragaria/fragaria_vesca/genome_v1.0">http://www.rosaceae.org/species/fragaria/fragaria_vesca/genome_v1.0</a>                                                           |
| strawberry                    |                                                                                                                                                                                                                 |
| [abinitio]                    | <a href="http://www.rosaceae.org/species/fragaria/fragaria_vesca/genome_v1.0">http://www.rosaceae.org/species/fragaria/fragaria_vesca/genome_v1.0</a>                                                           |
| watermelon                    | <a href="ftp://www.icugi.org/pub/genome/watermelon/97103/v1/">ftp://www.icugi.org/pub/genome/watermelon/97103/v1/</a>                                                                                           |
| cucumber[1]                   | <a href="ftp://www.icugi.org/pub/genome/cucumber/Chinese_long/v1/">ftp://www.icugi.org/pub/genome/cucumber/Chinese_long/v1/</a>                                                                                 |
| cucumber[2]                   | <a href="ftp://www.icugi.org/pub/genome/cucumber/Chinese_long/v2/">ftp://www.icugi.org/pub/genome/cucumber/Chinese_long/v2/</a>                                                                                 |
| cucumber[3]                   | <a href="ftp://www.icugi.org/pub/genome/cucumber/PI183967/">ftp://www.icugi.org/pub/genome/cucumber/PI183967/</a>                                                                                               |
|                               | <a href="ftp://ftp.jgi-psf.org/pub/compngen/phytozome/v9.0/Csativus/annotation/Csativus_122_protein.fa.gz">ftp://ftp.jgi-psf.org/pub/compngen/phytozome/v9.0/Csativus/annotation/Csativus_122_protein.fa.gz</a> |
| cucumber[4]                   |                                                                                                                                                                                                                 |
| grape [1]                     | <a href="https://urgi.versailles.inra.fr/Species/Vitis/Annotations">https://urgi.versailles.inra.fr/Species/Vitis/Annotations</a>                                                                               |
|                               | <a href="ftp://ftp.jgi-psf.org/pub/compngen/phytozome/v9.0/Vvinifera/assembly/Vvinifera_145.fa.gz">ftp://ftp.jgi-psf.org/pub/compngen/phytozome/v9.0/Vvinifera/assembly/Vvinifera_145.fa.gz</a>                 |
| grape [2]                     |                                                                                                                                                                                                                 |

**Supplemental Table S7.** List of collected samples of tomato and grape from GEO database.

| <b>species</b> | <b>GEO_number</b> | <b>post-ripening</b> | <b>pre-ripening</b> |
|----------------|-------------------|----------------------|---------------------|
| grape          | GSE11406          | Red_soft             | Green_soft          |
| grape          | GSE11406          | Red_soft             | Green_hard          |
| grape          | GSE11406          | Pink_soft            | Green_soft          |
| grape          | GSE11406          | Pink_soft            | Green_hard          |
| grape          | GSE20511          | <b>Withering_III</b> | Pre-veraison        |
| grape          | GSE20511          | <b>Withering_III</b> | Veraison            |
| grape          | GSE20511          | <b>Withering_III</b> | Pre-ripening        |
| grape          | GSE20511          | <b>Withering_II</b>  | Pre-veraison        |
| grape          | GSE20511          | <b>Withering_II</b>  | Veraison            |
| grape          | GSE20511          | <b>Withering_II</b>  | Pre-ripening        |
| grape          | GSE20511          | <b>Withering_I</b>   | Pre-veraison        |
| grape          | GSE20511          | <b>Withering_I</b>   | Veraison            |
| grape          | GSE20511          | <b>Withering_I</b>   | Pre-ripening        |
| grape          | GSE20511          | Ripening             | Pre-veraison        |
| grape          | GSE20511          | Ripening             | Veraison            |
| grape          | GSE20511          | Ripening             | Pre-ripening        |
| grape          | GSE28779          | ripe                 | green               |
| grape          | GSE28779          | ripe                 | medium_green        |
| grape          | GSE28779          | ripe                 | veraison            |
| grape          | GSE34634          | <b>HARvest</b>       | GREen               |
| grape          | GSE34634          | <b>HARvest</b>       | VERasion            |
| grape          | GSE35172          | RipE                 | VeraisoN            |
| grape          | GSE41206          | flesh_R2             | flesh_P             |
| grape          | GSE41206          | flesh_R2             | flesh_V1            |
| grape          | GSE41206          | flesh_R2             | flesh_V2            |
| grape          | GSE41206          | flesh_R1             | flesh_P             |
| grape          | GSE41206          | flesh_R1             | flesh_V1            |
| grape          | GSE41206          | flesh_R1             | flesh_V2            |
| grape          | GSE41206          | skin_R2              | skin_P              |
| grape          | GSE41206          | skin_R2              | skin_V1             |
| grape          | GSE41206          | skin_R2              | skin_V2             |
| grape          | GSE41206          | skin_R1              | skin_P              |
| grape          | GSE41206          | skin_R1              | skin_V1             |
| grape          | GSE41206          | skin_R1              | skin_V2             |
| grape          | GSE49569          | mature_Pulp          | PV_Pulp             |

|        |          |                       |                     |
|--------|----------|-----------------------|---------------------|
| grape  | GSE49569 | mature_Pulp           | midverasion_Pulp    |
| grape  | GSE49569 | mature_Skin           | PV_Skin             |
| grape  | GSE49569 | mature_Skin           | midverasion_Skin    |
| Tomato | GSE22300 | breaker +3 days fruit | 1-3mm fruit         |
| Tomato | GSE22300 | breaker +3 days fruit | 5-7mm fruit         |
| Tomato | GSE22300 | breaker +3 days fruit | 11-14mm fruit       |
| Tomato | GSE22300 | breaker +3 days fruit | mature green fruit  |
| Tomato | GSE22300 | breaker +3 days fruit | breaker stage fruit |
| Tomato | GSE22300 | breaker +5 days fruit | 1-3mm fruit         |
| Tomato | GSE22300 | breaker +5 days fruit | 5-7mm fruit         |
| Tomato | GSE22300 | breaker +5 days fruit | 11-14mm fruit       |
| Tomato | GSE22300 | breaker +5 days fruit | mature green fruit  |
| Tomato | GSE22300 | breaker +5 days fruit | breaker stage fruit |
| Tomato | GSE22300 | breaker +7 days fruit | 1-3mm fruit         |
| Tomato | GSE22300 | breaker +7 days fruit | 5-7mm fruit         |
| Tomato | GSE22300 | breaker +7 days fruit | 11-14mm fruit       |
| Tomato | GSE22300 | breaker +7 days fruit | mature green fruit  |
| Tomato | GSE22300 | breaker +7 days fruit | breaker stage fruit |
| Tomato | GSE28564 | normal_pink_coloring  | normal_mature_green |
| Tomato | GSE42783 | AC_RR                 | AC_MG               |
| Tomato | GSE42783 | AC_RR                 | AC_T                |

A total of 247 array samples collected in 10 independent experiments on the terminal stage in fruit life history of the two model fruits from GEO database. Samples from fruits after harvest are in bold.
